# Supplementary material for: Phenotypic and Genotypic Spectrum of Early-Onset Developmental and Epileptic Encephalopathies—Data from a Romanian Cohort
Source: MDPI journal article supplement (doi:10.3390/genes13071253), 2022-07-15
Supplement: s1 [file s1]

Table S1. Clinical phenotype of Dravet Syndrome (DS) cases, as described in studies on European populations with *SNC1A* mutations

[illegible]

(typical+atypical/  
could be  
either)Absence

|                                                 |                     |                     |                   |                   |                  |                  |                   |   |                   |   |   |
|-------------------------------------------------|---------------------|---------------------|-------------------|-------------------|------------------|------------------|-------------------|---|-------------------|---|---|
| seizures                                        | 1/168<br>(0.6%)     | -                   | 37<br>(55.2%)     | -                 | -                | 1/11<br>(9.09%)  | -                 | - | -                 | - | - |
| Status epilepticus<br>at onset /in<br>evolution | -                   | 188/235<br>(80%)    | 52<br>(77.6%)     | 33/37<br>(89.19%) | 7/15<br>(46.67%) | 8/11<br>(72.73%) | -                 | - | 5/14<br>(35.71%)  | - | - |
| <b>Electrophysiology</b>                        |                     |                     |                   |                   |                  |                  |                   |   |                   |   |   |
| -                                               | 38/88<br>(43.18%)   |                     |                   | 37/37<br>(100%)   | -                | -                | -                 | - | -                 | - | - |
| <b>interictal EEG</b>                           |                     |                     |                   |                   |                  |                  |                   |   |                   |   |   |
| <b>Seizure-inducing<br/>factors</b>             |                     |                     |                   |                   |                  |                  |                   |   |                   |   |   |
| Fever                                           | 134/167<br>(80.24%) | 134/230<br>(58.26%) | 58<br>(86.6%)     | 37/37<br>(100%)   | 17/17 (100%)     | 8/11<br>(72.73%) | -                 | - | 7/14<br>(50%)     | - | - |
| Infections                                      | -                   | -                   | -                 | -                 | -                | -                | -                 | - | -                 | - | - |
| Vaccines                                        | -                   | 17/230<br>(7.39%)   | -                 | -                 | -                | -                | -                 | - | -                 | - | - |
| <b>Intellectual<br/>disability</b>              | -                   | -                   | 63/67<br>(94.03%) | 32/37<br>(86.48%) | 6/10<br>(60%)    | 7/11<br>(63.64%) | 80.5%             | - | -                 | - | - |
| <b>Global<br/>developmental<br/>delay</b>       | -                   | -                   | 66/66<br>(100%)   | -                 | 4/16<br>(25%)    | -                | -                 | - | 13/14<br>(92.85%) | - | - |
| <b>Speech delay / no<br/>speech</b>             | -                   | -                   | 31/58<br>(53.45%) |                   | -                | 2/11<br>(18.19%) | 54/91<br>(59.34%) | - | -                 | - | - |
| <b>Behavioral issues</b>                        | -                   | 98/213<br>(46.01%)  | -                 | 21/37<br>(56,75%) | -                | 2/11<br>(18.19%) | NA                | - | -                 | - | - |
| <b>Motor delay</b>                              | -                   | 77/214<br>(35.98%)  | 66/66<br>(100%)   | 37/37<br>(100%)   | 1/14 (7,14%)     | 5/11<br>(45.45%) | 57/91<br>(62.64%) | - | -                 | - | - |
| <b>Abnormal brain<br/>MRI</b>                   | -                   | 22/200 (11%)        | -                 | 13/36             | -                | 1/11 (9.09%)     | -                 | - | -                 | - | - |
| <b>Normal Brain<br/>MRI</b>                     | -                   | 0.89                | -                 | 23/36<br>(64%)    | -                | -                | -                 | - | -                 | - | - |

|                                                |                                                                                                                   |                                                       |                                                     |                  |                         |                                         |    |                           |                                                                                 |                                                               |                    |
|------------------------------------------------|-------------------------------------------------------------------------------------------------------------------|-------------------------------------------------------|-----------------------------------------------------|------------------|-------------------------|-----------------------------------------|----|---------------------------|---------------------------------------------------------------------------------|---------------------------------------------------------------|--------------------|
| <b>Brain atrophy</b>                           | -                                                                                                                 | 7/22<br>(31.82%)                                      | -                                                   | 5/36<br>(13.88%) | -                       | -                                       | -  | -                         | -                                                                               | -                                                             | -                  |
| <b>Familial history of seizures / epilepsy</b> | 111/199<br>(55.78%)                                                                                               | 65/223<br>(29.15%)                                    | 25/67<br>(37.31%)                                   | 16/35<br>(46%)   | -                       | 4/11<br>(36.36%)                        | -  | -                         | -                                                                               | -                                                             | -                  |
| <b>Genetic diagnosis method</b>                | direct sequencing; next gen amplicon sequencing, confirmed by Sanger sequencing; mutation negative samples - MLPA | standard sequencing; mutation negative samples - MLPA | direct sequencing; mutation negative samples - MLPA | DHPLC, MLPA      | direct sequencing, MLPA | Sanger sequencing, segregation analysis | NA | NGS - various gene panels | custom-designed 104-gene epilepsy panel; Sanger sequencing and MLPA of 10 genes | fluorescence-based competitive allele-specific (KASPar) assay | NGS - clinical WGS |

\* for cases with SCN1A mutations

\* for genetically diagnosed cases

## References

1. Cetica, V., et al., *Clinical and genetic factors predicting Dravet syndrome in infants with SCN1A mutations*. Neurology, 2017. **88**(11): p. 1037-1044.
2. Brunklaus, A., et al., *Prognostic, clinical and demographic features in SCN1A mutation-positive Dravet syndrome*. Brain, 2012. **135**(8): p. 2329-2336.
3. Nabbout, R., et al., *Encephalopathy in children with Dravet syndrome is not a pure consequence of epilepsy*. Orphanet journal of rare diseases, 2013. **8**(1): p. 1-8.
4. Ragona, F., et al., *Dravet syndrome: early clinical manifestations and cognitive outcome in 37 Italian patients*. Brain and Development, 2010. **32**(1): p. 71-77.
5. Till, Á., et al., *Mutation spectrum of the SCN1A gene in a Hungarian population with epilepsy*. Seizure, 2020. **74**: p. 8-13.
6. Peycheva, V., et al., *SCN1A mutation spectrum in a cohort of Bulgarian patients with GEFS+ phenotype*. Turkish Journal of Pediatrics, 2020. **62**(5).
7. Nabbout, R., et al., *Impact of childhood Dravet syndrome on care givers of patients with DS, a major impact on mothers*. Epilepsy & Behavior, 2020. **108**: p. 107094.
8. Johannesen, K.M., et al., *Utility of genetic testing for therapeutic decision - making in adults with epilepsy*. Epilepsia, 2020. **61**(6): p. 1234-1239.
9. Symon DS, J.D., et al., *Incidence and phenotypes of childhood-onset genetic epilepsies: a prospective population-based national cohort*. Brain, 2019. **142**(8): p. 2303-2318.
10. Bertok, S., et al., *The association of SCN1A p. Thr1067Ala polymorphism with epilepsy risk and the response to antiepileptic drugs in Slovenian children and adolescents with epilepsy*. Seizure, 2017. **51**: p. 9-13.
11. Stranneheim, H., et al., *Integration of whole genome sequencing into a healthcare setting: high diagnostic rates across multiple clinical entities in 3219 rare disease patients*. Genome medicine, 2021. **13**(1): p. 1-15.
